# Supplementary material
Source: PubMed Central journal article supplement (PMC8274685)
Supplement: NIHPP2021.02.02.429458V2-supplement-1.pdf [file NIHPP2021.02.02.429458V2-supplement-1.pdf]

## Supplemental Information

### Naive human B cells engage the receptor binding domain of SARS-CoV-2, variants of concern, and related sarbecoviruses

Jared Feldman<sup>1†</sup>, Julia Bals<sup>1†</sup>, Clara G. Altomare<sup>2</sup>, Kerri St. Denis<sup>1</sup>, Evan C. Lam<sup>1</sup>, Blake M. Hauser<sup>1</sup>, Larance Ronsard<sup>1</sup>, Maya Sangesland<sup>1</sup>, Thalia Bracamonte Moreno<sup>1</sup>, Vintus Okonkwo<sup>1</sup>, Nathania Hartojo<sup>1</sup>, Alejandro B. Balazs<sup>1</sup>, Goran Bajic<sup>2</sup>, Daniel Lingwood<sup>1\*</sup> and Aaron G. Schmidt<sup>1,3\*</sup>

<sup>1</sup>Ragon Institute of MGH, MIT and Harvard, Cambridge, MA, 02139, USA

<sup>2</sup>Department of Microbiology, Icahn School of Medicine at Mount Sinai, New York, NY 10029

<sup>3</sup>Department of Microbiology, Harvard Medical School, Boston, MA 02115, USA

\*Correspondence to: Email: [dlingwood@mgh.harvard.edu](mailto:dlingwood@mgh.harvard.edu) (D.L.); [aschmidt@crystal.harvard.edu](mailto:aschmidt@crystal.harvard.edu) (A.G.S)

†These authors contributed equally to this work.

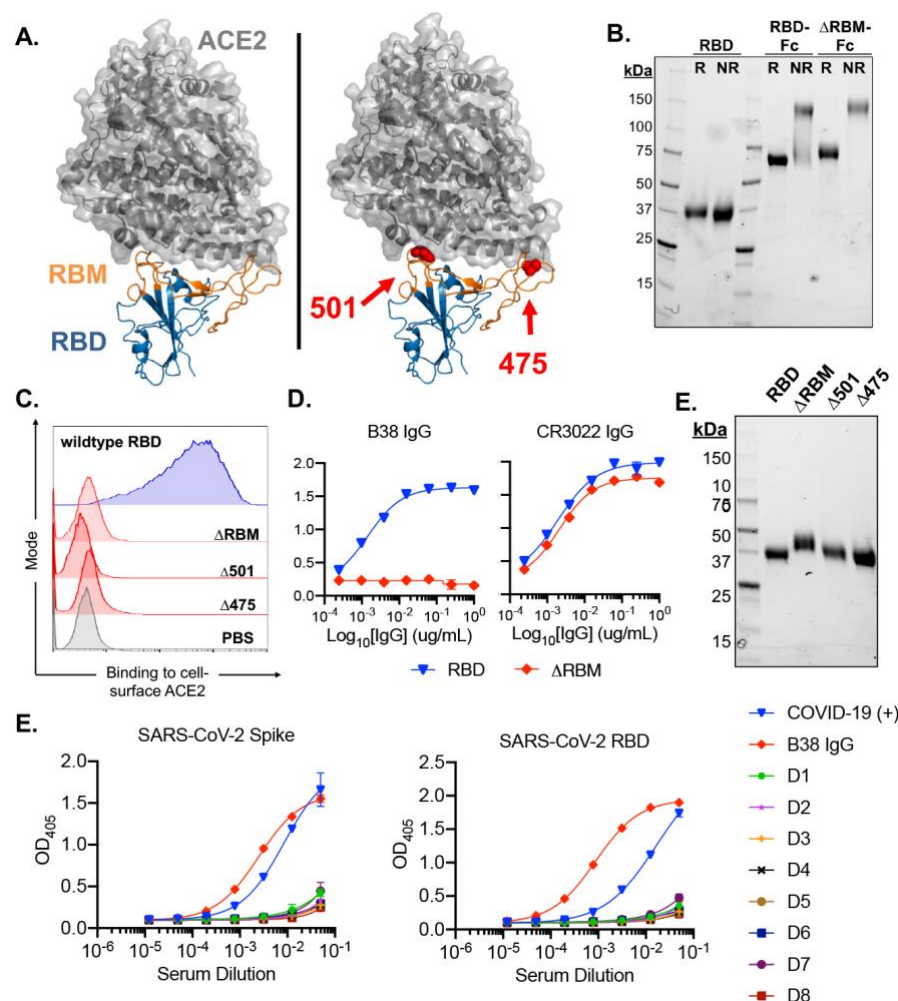

**fig. S1. Design and characterization of SARS-CoV-2 antigens and healthy donor sera binding.** (A) SARS-CoV-2 RBD in complex with viral receptor, ACE2 shown in blue and grey, respectively (PDB 6M0J). Wild-type RBD with, the receptor binding motif (RBM), shown in orange (left panel). Structural model of the  $\Delta$ RBM probe designed to abrogate binding to ACE2 (right panel). Putative N-linked glycosylation sites engineered onto the RBM are shown in red spheres at amino acid positions 501 and 475. (B) SDS-PAGE gel under reducing (R) and non-reducing (NR) conditions for monomeric RBD, RBD-Fc and  $\Delta$ RBM-Fc. (C) Wildtype RBD,  $\Delta$ RBM and single glycan variant binding to ACE2-expressing 293T cells by flow cytometry. Wild-type RBD binding shown in blue, glycan variant binding shown in red. Streptavidin-PE was used to detect the relative intensity of antigen binding to cell-surface ACE2. A PBS control (gray) indicates secondary-only staining. (D) Control antibody ELISA binding to RBD and  $\Delta$ RBM antigens. RBM-specific antibody, B38 (left). Non-RBM-specific control antibody, CR3022 (right). (E)  $\Delta$ RBM and  $\Delta$ 501 and  $\Delta$ 475 variants analyzed by SDS-PAGE gel under reducing conditions; wildtype RBD is shown for comparison. (E) SARS-CoV-2 spike (left) and RBD (right) sera ELISA from human subjects 1-8. Sera from a COVID-19 convalescent patient and control antibody, B38, were included as positive controls.

**A.**

**Sort Strategy Overview: Donor 6**

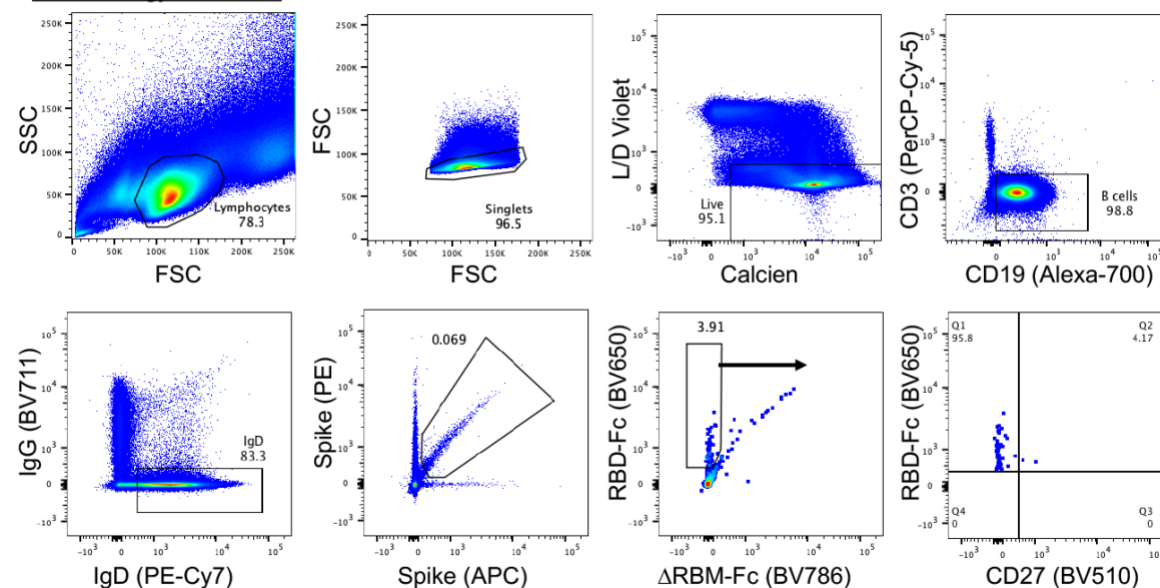

**B.**

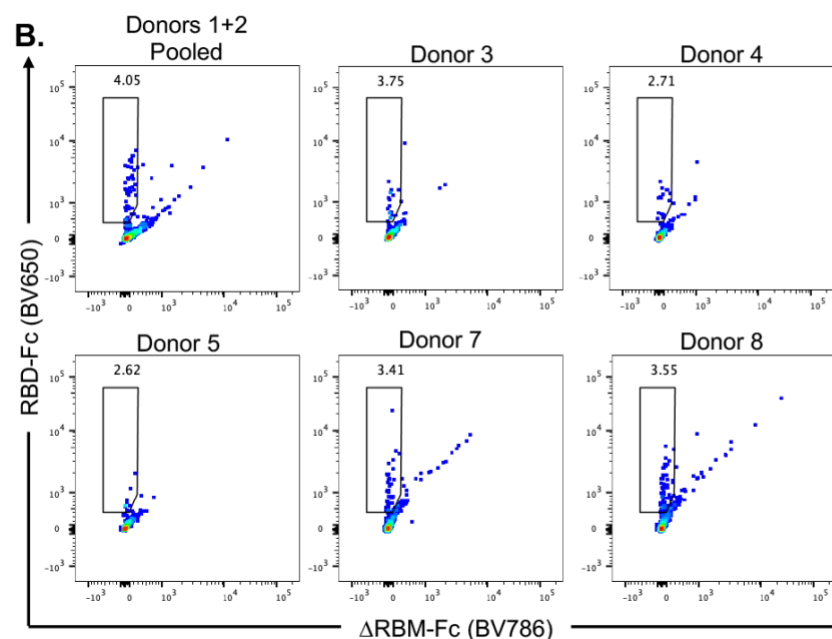

**C.**

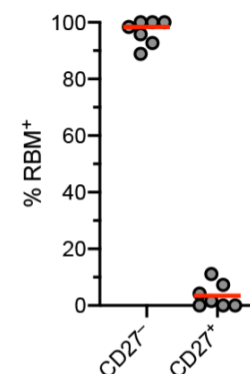

**fig. S2. PBMC flow cytometry analyses.** (A) Representative gating strategy used for FACS of PBMCs pooled from donors 1 and 2. Gating was on naive B cells defined by single living lymphocytes that were CD19<sup>+</sup>CD3<sup>+</sup>IgD<sup>+</sup>IgG<sup>-</sup>. Sorted cells were RBM-specific as defined by spike-PE<sup>+</sup>/spike-APC<sup>+</sup>/RBD-Fc-BV650<sup>+</sup>/ΔRBM-Fc-BC650<sup>-</sup>. Sort gate is denoted by the blue arrow. The bottom right plot shows CD27 staining of sorted RBM-specific naive B cells. (B) Flow cytometry showing the sort gate and percentage of RBM-specific B cells for the remaining 6 healthy human donors. (C) RBM-specific B cell frequency among CD27<sup>+</sup> and CD27<sup>-</sup> cells. Each symbol represents a different donor ( $n = 8$ ).

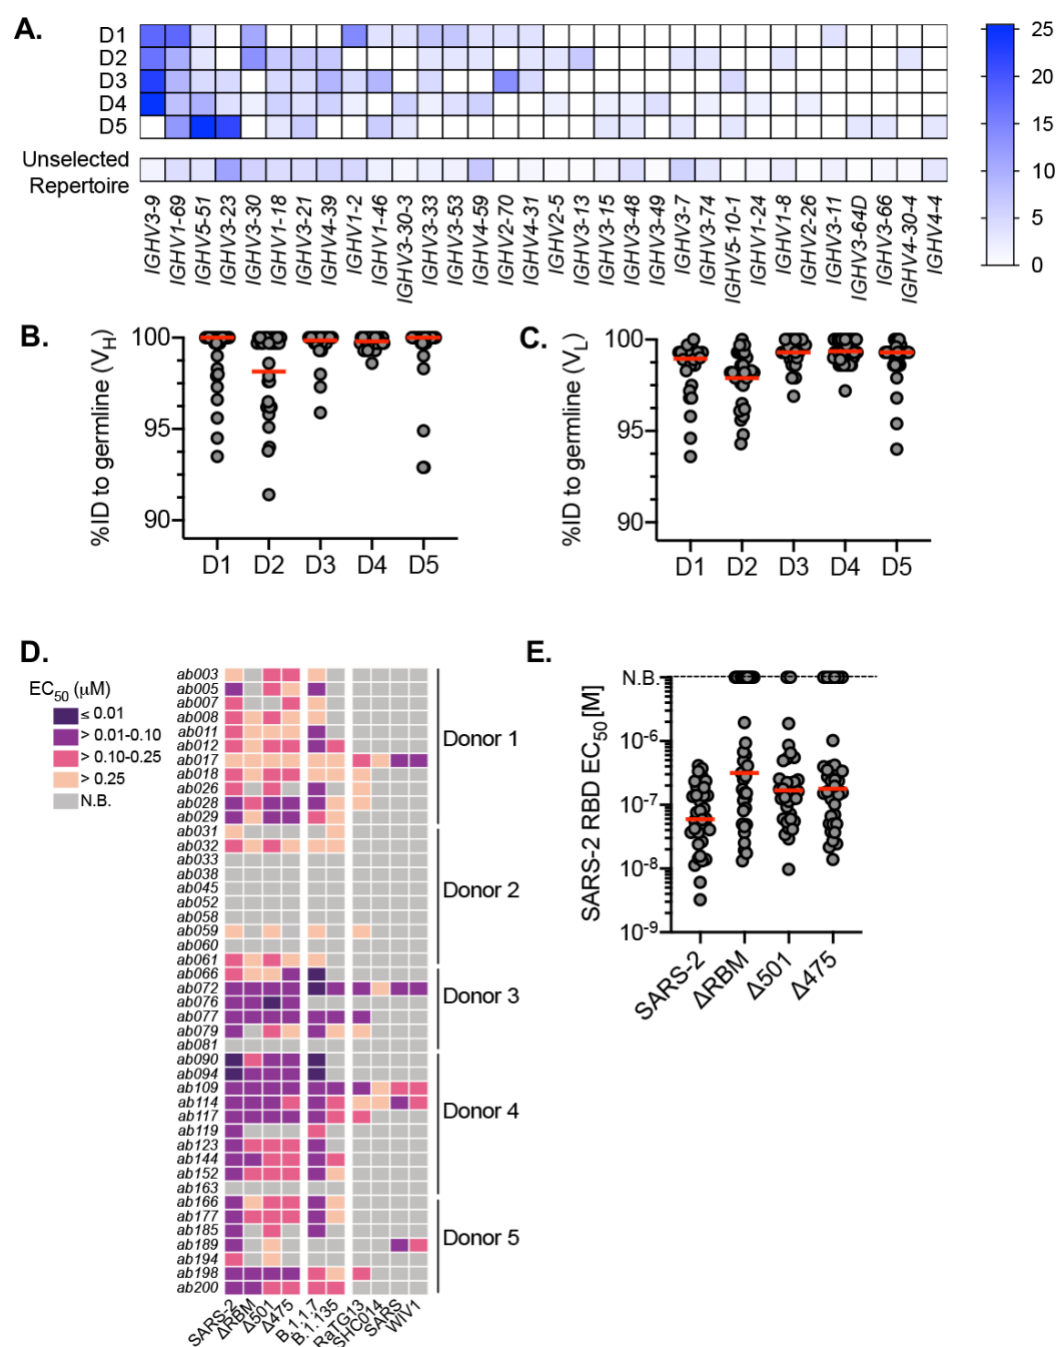

**fig. S3. Repertoire comparison, germline identity, and IgG binding by individual donor.** (A) Heatmap showing V<sub>H</sub>-gene usage of isolated antibodies derived from donors 1-5. Unselected repertoire gene usage derive from a high-throughput sequencing data set of circulating B cells across 10 human subjects (46). Heatmap scale represents percent of total paired sequence from each donor. Divergence from inferred germline gene sequences separated by individual donor for (B) V<sub>H</sub> and (C) V<sub>L</sub>. Red bars indicate the median percent values, and each dot represents an individual paired sequence. (D) Heatmap showing IgG binding to RBDs (*n* = 44) sorted by donor. (E) ELISA EC<sub>50</sub> values for IgGs with detectable SARS-CoV-2 RBD binding (*n* = 36) against RBM glycan probes. Red bars indicate the mean EC<sub>50</sub> values.

1017

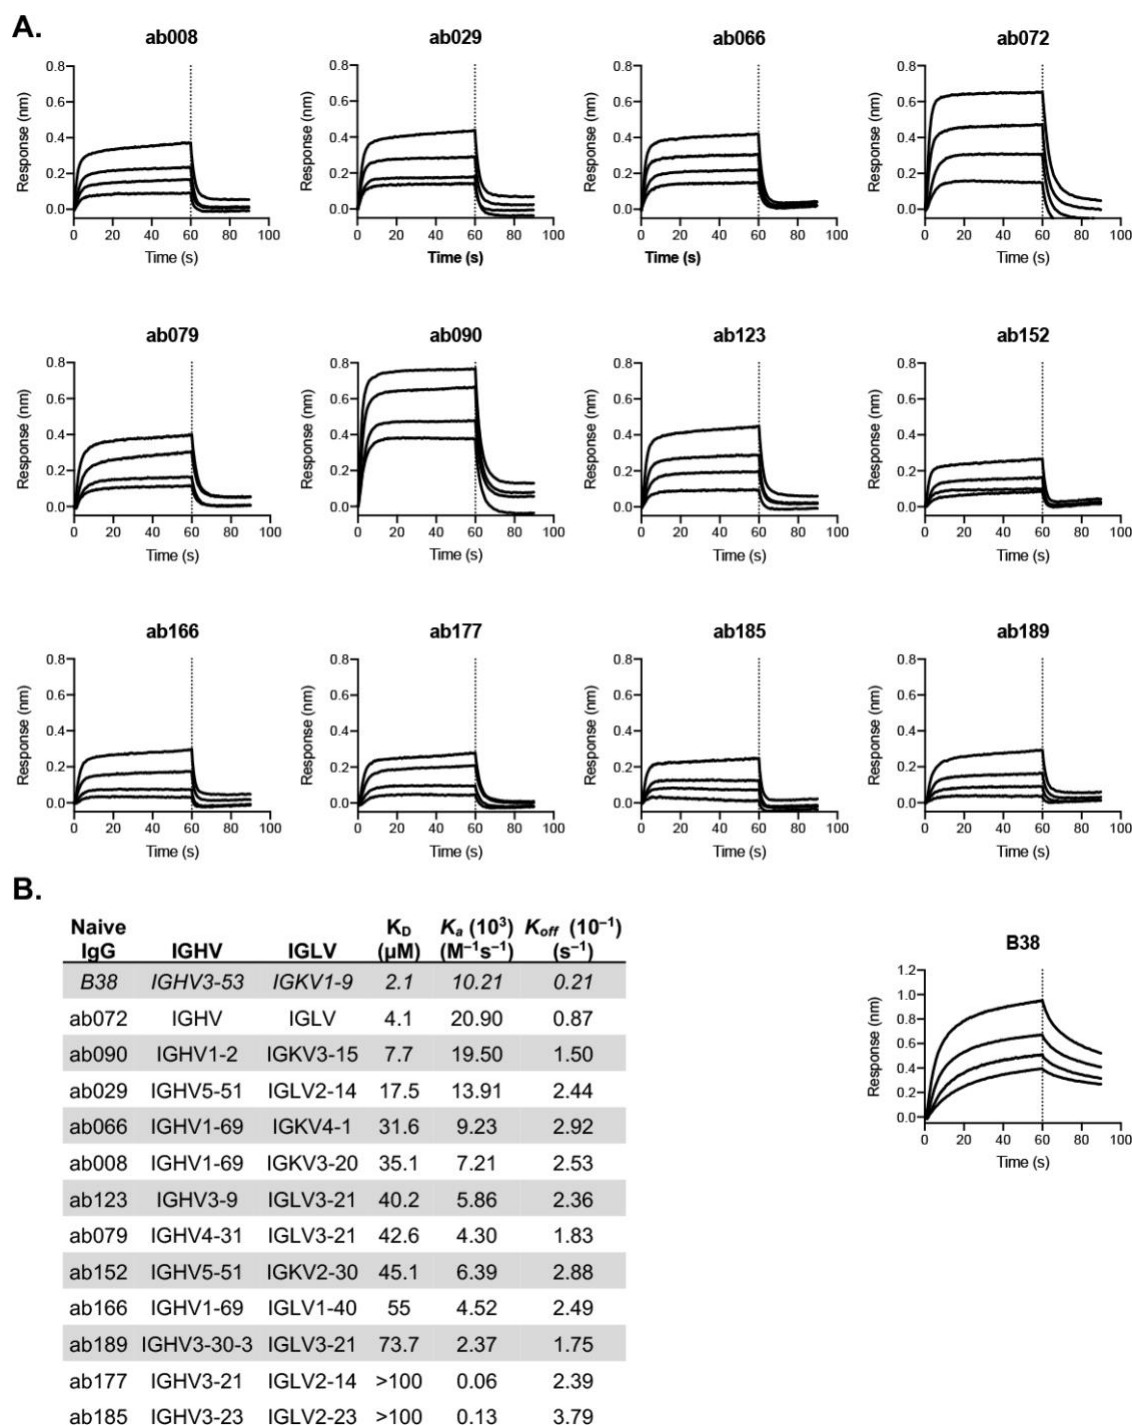

**fig. S4. SARS-CoV-2 RBD-binding kinetics of isolated naive antibodies.** (A) Biolayer interferometry (BLI) binding kinetic analysis of titrated SARS-CoV-2 RBD to immobilized Fabs. Dotted line at 60 s denotes the start of the dissociation phase. (B) Kinetic and equilibrium constants for binding to RBD calculated from a 1:1 binding model using a global fit to all curves for each Fab using vendor supplied software. B38 Fab is used as a positive control.

1025  
1026 **A.**

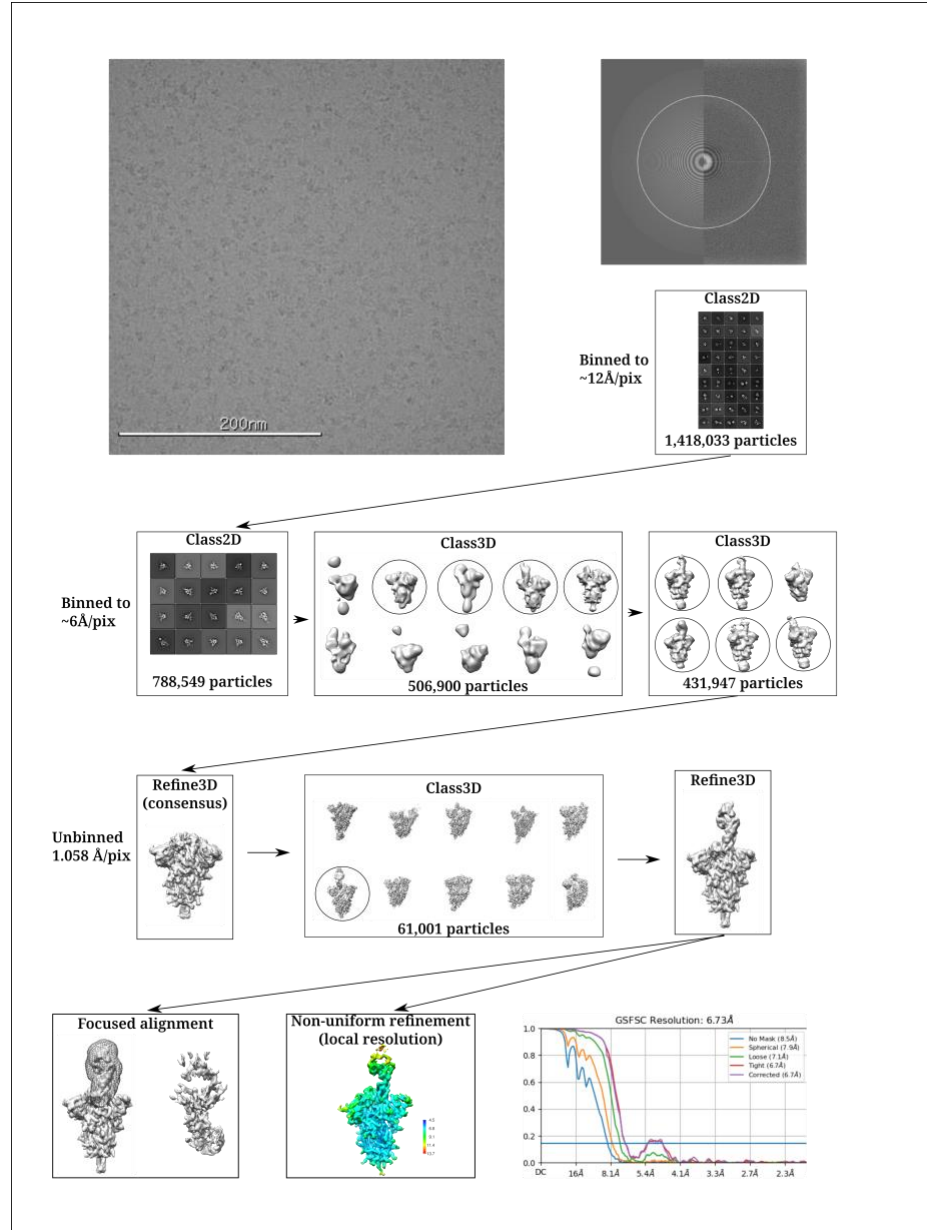

1027  
1028

1029 **B.**

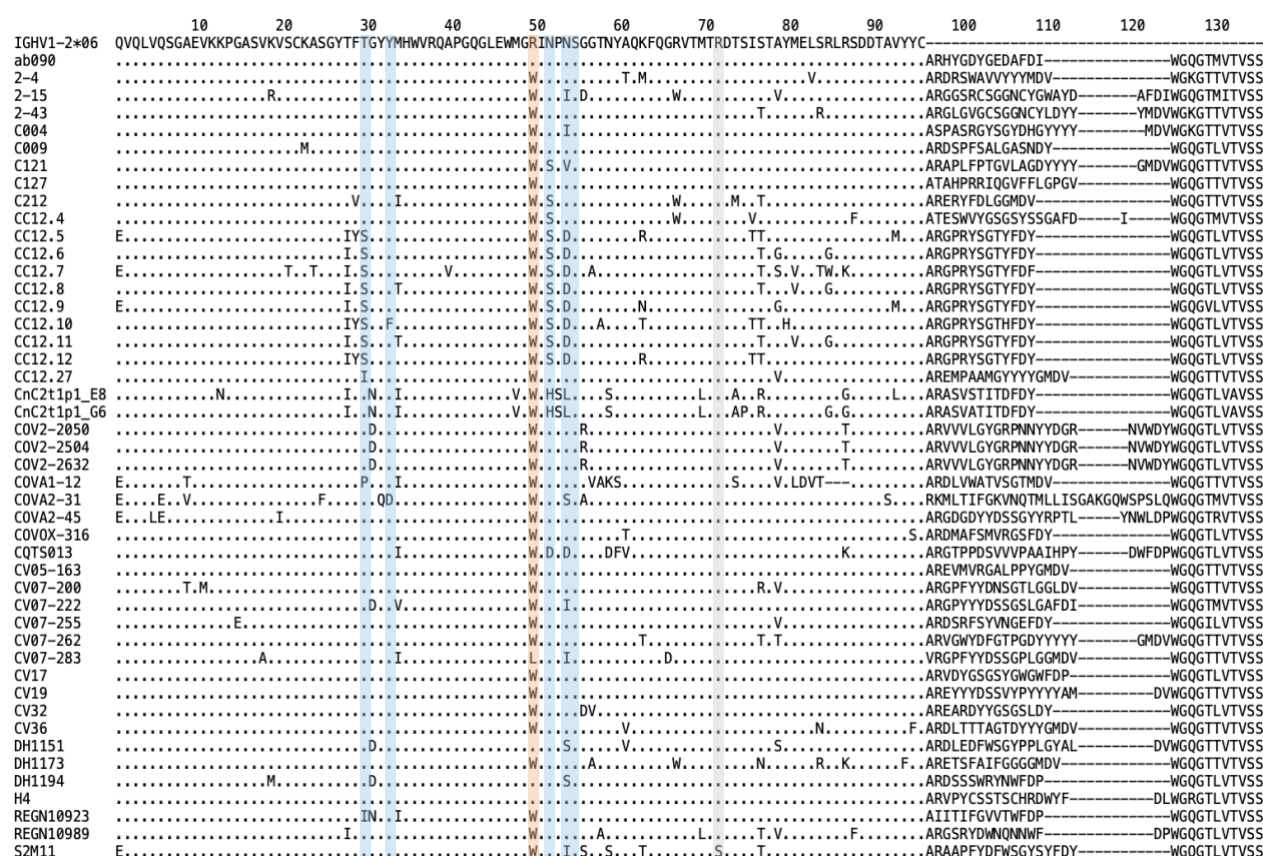

1030 **fig. S5. Structural characterization and analysis. (A)** Cryo-EM data processing scheme of  
 1031 ab090 Fab bound with SARS-CoV-2 spike. See the Methods section for more details. **(B)** Heavy  
 1032 chain amino acid sequence alignment of ab090 with IGHV1-2 derived antibodies from  
 1033 convalescent COVID-19 patients. Sequences were obtained from CoV-AbDab (118) and aligned  
 1034 to the IGHV1-2\*06 reference. Residues forming the germline-encoded HCDR1 and HCDR2 motif  
 1035 contacting the SARS-CoV-2 RBD are highlighted in blue. The single nucleotide polymorphism in  
 1036 the \*06 allele at position 50 is highlighted red. The site of the dominant mutation from *in vitro*  
 1037 affinity maturation efforts with ab090 is highlighted in green.

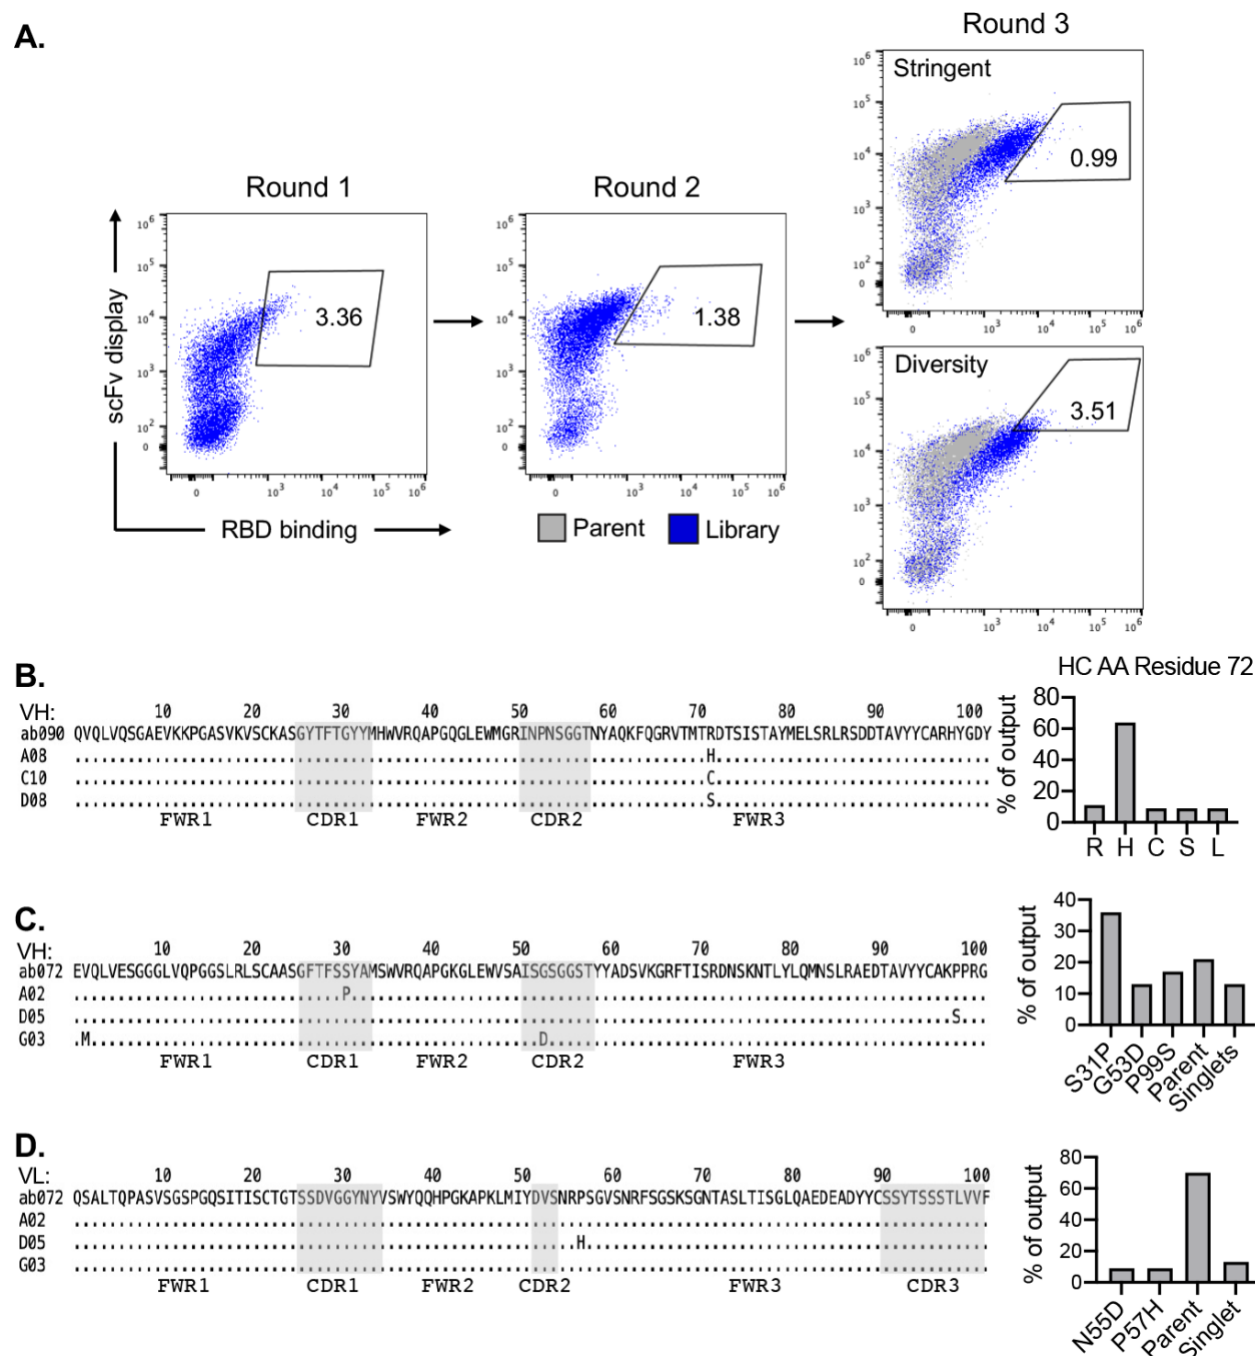

**fig. S6. Representative affinity maturation selection strategy and output sequence overview.**

(A) Flow cytometric sorting of diversified single chain variable fragment (scFv) libraries of ab090. Gates represent the yeast population sorted for subsequent selections. After 2 rounds of enrichment for wildtype SARS-CoV-2 binding, a “stringent” and “diversity gate were sorted in round 3 indicating the yeast populations sorted for individual colony isolation and sequencing. Alignment of the V<sub>H</sub> sequencing output clones for ab090 (B) and ab072 (C) with the output frequency of each mutation from a total of 48 single colonies. (D) Alignment of the V<sub>L</sub> sequencing output clones ab072 with the output frequency of each mutation from a total of 48 single colonies. The V<sub>L</sub> output for ab090 was exclusively parent.
